# Supplementary material
Source: ML conference proceedings conference paper supplement (https://proceedings.neurips.cc/paper_files/paper/2022/hash/4c0986bd04d747745beba3752bdf4d9d-Abstract.html)
Supplement: Supplementary file 1 [file 4c0986bd04d747745beba3752bdf4d9d-Supplemental-Datasets_and_Benchmarks.pdf]

Table 5: Per-class accuracy scores on RVL-CDIP- $N$  for each document classification model.

| Model      | budget | email | form  | handwritten | invoice | letter | memo  | news_article | questionnaire | resume | scientific_pub. | specification |
|------------|--------|-------|-------|-------------|---------|--------|-------|--------------|---------------|--------|-----------------|---------------|
| VGG-16     | 0.793  | 0.848 | 0.743 | 0.403       | 0.737   | 0.901  | 0.553 | 0.686        | 0.718         | 0.696  | 0.974           | 0.230         |
| ResNet-50  | 0.810  | 0.758 | 0.714 | 0.358       | 0.421   | 0.803  | 0.511 | 0.570        | 0.641         | 0.674  | 0.949           | 0.148         |
| GoogLeNet  | 0.776  | 0.818 | 0.700 | 0.449       | 0.439   | 0.816  | 0.553 | 0.616        | 0.513         | 0.609  | 0.923           | 0.115         |
| AlexNet    | 0.690  | 0.727 | 0.443 | 0.352       | 0.526   | 0.836  | 0.404 | 0.558        | 0.487         | 0.663  | 0.949           | 0.148         |
| LayoutLMv2 | 0.897  | 0.848 | 0.529 | 0.261       | 0.333   | 0.836  | 0.511 | 0.512        | 0.769         | 0.565  | 0.923           | 0.164         |
| DiT        | 0.862  | 0.970 | 0.914 | 0.624       | 0.860   | 0.954  | 0.723 | 0.849        | 0.821         | 0.734  | 0.923           | 0.410         |

## A Additional Results

### A.1 RVL-CDIP- $N$ Confusion Matrices

Table 5 displays accuracy scores for each document category in RVL-CDIP- $N$ . There are several patterns: all models perform well on `scientific_publication` but typically poorly on `handwritten` and `specification`. (See Figures 30 and 31 for a comparison between `specification` documents from RVL-CDIP- $N$  and RVL-CDIP, and Figures 24 and 25 for a comparison between `handwritten` documents.) Tables 8–13 display model confusion matrices on RVL-CDIP- $N$ .

### A.2 Model Prediction Similarity

Tables 6 and 7 show pairwise similarity scores for each model on RVL-CDIP- $N$  and RVL-CDIP- $O$ , respectively. Here, we compute similarity between a pair of models by computing the Hamming similarity between predicted labels, or

$$\text{sim}(\mathbf{y}_a, \mathbf{y}_b) = \frac{1}{N} \sum_{i=1}^N \mathbb{1}(\mathbf{y}_a^i = \mathbf{y}_b^i)$$

where  $\mathbf{y}_a^i$  is model  $a$ 's predicted label on the  $i^{\text{th}}$  test document. We find that there is a higher degree of similarity in model predictions on RVL-CDIP- $N$  than on RVL-CDIP- $O$ .

### A.3 In- versus Out-of-Domain Performance

Tables 14 and 15 chart AUC scores for MSP on RVL-CDIP versus RVL-CDIP- $O$  (Table 14) and on RVL-CDIP- $N$  versus RVL-CDIP- $O$  (Table 15). Tables 16 and 17 chart AUC scores for Energy on RVL-CDIP versus RVL-CDIP- $O$  (Table 17) and on RVL-CDIP- $N$  versus RVL-CDIP- $O$  (Table 17). We find that the Augraphy augmentations typically have little impact. The main finding in Tables 14–17 is that out-of-domain detection suffers on the more realistic RVL-CDIP- $N$  versus RVL-CDIP- $O$  setting, where both sets of test documents are out-of-distribution. This is in contrast with the  $T-O$  setting where we use the in-distribution RVL-CDIP test set as the in-domain data. We report similar findings using the FPR95 metric in Tables 18–21.

### A.4 Confidence Scores

Figures 8–19 show relationships between confidence scores and performance on RVL-CDIP and RVL-CDIP- $N$  accuracy as well as RVL-CDIP- $O$  detection rate. We see that as confidence score threshold increases, the detection rate on RVL-CDIP- $O$  increases while accuracy on RVL-CDIP and RVL-CDIP- $N$  naturally decreases due to the decision rule defined in 4.2. Figures 8–19 also display distributions of model confidence scores for RVL-CDIP- $N$  and RVL-CDIP- $O$ . We see that there is a large amount of overlap between the two distributions for all models and for both MSP and Energy confidence score methods, which helps explain the drop in AUC scores on the  $N-O$  (RVL-CDIP- $N$  versus RVL-CDIP- $O$ ) setting.

|            | VGG-16 | ResNet-50 | GoogLeNet | AlexNet | LayoutLMv2 | DiT  |
|------------|--------|-----------|-----------|---------|------------|------|
| VGG-16     | 1.00   | 0.63      | 0.61      | 0.62    | 0.57       | 0.65 |
| ResNet-50  |        | 1.00      | 0.58      | 0.57    | 0.57       | 0.58 |
| GoogLeNet  |        |           | 1.00      | 0.56    | 0.54       | 0.57 |
| AlexNet    |        |           |           | 1.00    | 0.55       | 0.56 |
| LayoutLMv2 |        |           |           |         | 1.00       | 0.55 |
| DiT        |        |           |           |         |            | 1.00 |

Table 6: Pairwise similarity between predictions made by each model on RVL-CDIP-*N*.

|            | VGG-16 | ResNet-50 | GoogLeNet | AlexNet | LayoutLMv2 | DiT  |
|------------|--------|-----------|-----------|---------|------------|------|
| VGG-16     | 1.00   | 0.45      | 0.43      | 0.44    | 0.42       | 0.27 |
| ResNet-50  |        | 1.00      | 0.46      | 0.42    | 0.43       | 0.33 |
| GoogLeNet  |        |           | 1.00      | 0.41    | 0.40       | 0.30 |
| AlexNet    |        |           |           | 1.00    | 0.39       | 0.28 |
| LayoutLMv2 |        |           |           |         | 1.00       | 0.30 |
| DiT        |        |           |           |         |            | 1.00 |

Table 7: Pairwise similarity between predictions made by each model on RVL-CDIP-*O*.

Table 8: Confusion matrix for VGG-16 on the RVL-CDIP-*N* data. True labels are rows, and predicted labels are columns.

|                 | advertisement | budget       | email        | file_folder | form         | handwritten  | invoice      | letter       | memo         | news_article | presentation | questionnaire | resume       | scientific_pub. | scientific_rep. | specification |
|-----------------|---------------|--------------|--------------|-------------|--------------|--------------|--------------|--------------|--------------|--------------|--------------|---------------|--------------|-----------------|-----------------|---------------|
| advertisement   | —             | —            | —            | —           | —            | —            | —            | —            | —            | —            | —            | —             | —            | —               | —               | —             |
| budget          | 0.000         | <b>0.793</b> | 0.017        | 0.000       | 0.034        | 0.000        | 0.017        | 0.000        | 0.000        | 0.000        | 0.000        | 0.052         | 0.000        | 0.017           | 0.052           | 0.000         |
| email           | 0.000         | 0.061        | <b>0.848</b> | 0.000       | 0.000        | 0.000        | 0.000        | 0.000        | 0.000        | 0.000        | 0.000        | 0.030         | 0.061        | 0.000           | 0.000           | 0.000         |
| file_folder     | —             | —            | —            | —           | —            | —            | —            | —            | —            | —            | —            | —             | —            | —               | —               | —             |
| form            | 0.000         | 0.043        | 0.000        | 0.000       | <b>0.743</b> | 0.000        | 0.014        | 0.014        | 0.000        | 0.000        | 0.043        | 0.029         | 0.029        | 0.000           | 0.000           | 0.086         |
| handwritten     | 0.023         | 0.051        | 0.000        | 0.051       | 0.040        | <b>0.403</b> | 0.011        | 0.091        | 0.080        | 0.000        | 0.006        | 0.028         | 0.011        | 0.011           | 0.193           | 0.000         |
| invoice         | 0.000         | 0.105        | 0.000        | 0.000       | 0.035        | 0.000        | <b>0.737</b> | 0.070        | 0.018        | 0.000        | 0.000        | 0.018         | 0.000        | 0.000           | 0.018           | 0.000         |
| letter          | 0.000         | 0.007        | 0.020        | 0.007       | 0.000        | 0.000        | 0.000        | <b>0.901</b> | 0.000        | 0.013        | 0.033        | 0.000         | 0.020        | 0.000           | 0.000           | 0.000         |
| memo            | 0.000         | 0.021        | 0.043        | 0.000       | 0.021        | 0.000        | 0.000        | 0.128        | <b>0.553</b> | 0.000        | 0.043        | 0.043         | 0.085        | 0.021           | 0.043           | 0.000         |
| news_article    | 0.128         | 0.012        | 0.000        | 0.023       | 0.000        | 0.000        | 0.000        | 0.000        | 0.000        | <b>0.686</b> | 0.023        | 0.000         | 0.012        | 0.093           | 0.023           | 0.000         |
| presentation    | —             | —            | —            | —           | —            | —            | —            | —            | —            | —            | —            | —             | —            | —               | —               | —             |
| questionnaire   | 0.000         | 0.051        | 0.000        | 0.000       | 0.077        | 0.000        | 0.000        | 0.000        | 0.000        | 0.000        | <b>0.718</b> | 0.051         | 0.043        | 0.077           | 0.026           |               |
| resume          | 0.022         | 0.011        | 0.022        | 0.000       | 0.033        | 0.000        | 0.016        | 0.016        | 0.000        | 0.000        | 0.016        | 0.049         | <b>0.696</b> | 0.974           | 0.033           | 0.033         |
| scientific_pub. | 0.000         | 0.000        | 0.000        | 0.000       | 0.026        | 0.000        | 0.000        | 0.000        | 0.000        | 0.000        | 0.000        | 0.000         | 0.000        | <b>0.974</b>    | 0.000           | 0.000         |
| scientific_rep. | —             | —            | —            | —           | —            | —            | —            | —            | —            | —            | —            | —             | —            | —               | —               | —             |
| specification   | 0.197         | 0.022        | 0.049        | 0.000       | 0.131        | 0.000        | 0.098        | 0.000        | 0.000        | 0.016        | 0.049        | 0.033         | 0.033        | 0.098           | <b>0.033</b>    | <b>0.230</b>  |

Table 9: Confusion matrix for ResNet-50 on the RVL-CDIP-*N* data. True labels are rows, and predicted labels are columns.

|                 | advertisement | budget       | email        | file_folder | form         | handwritten  | invoice      | letter       | memo         | news_article | presentation | questionnaire | resume       | scientific_pub. | scientific_rep. | specification |
|-----------------|---------------|--------------|--------------|-------------|--------------|--------------|--------------|--------------|--------------|--------------|--------------|---------------|--------------|-----------------|-----------------|---------------|
| advertisement   | —             | —            | —            | —           | —            | —            | —            | —            | —            | —            | —            | —             | —            | —               | —               | —             |
| budget          | 0.000         | <b>0.810</b> | 0.000        | 0.000       | 0.052        | 0.000        | 0.017        | 0.000        | 0.000        | 0.000        | 0.000        | 0.052         | 0.000        | 0.017           | 0.069           | 0.000         |
| email           | 0.000         | 0.061        | <b>0.758</b> | 0.000       | 0.030        | 0.000        | 0.000        | 0.030        | 0.000        | 0.000        | 0.000        | 0.030         | 0.061        | 0.000           | 0.000           | 0.030         |
| file_folder     | —             | —            | —            | —           | —            | —            | —            | —            | —            | —            | —            | —             | —            | —               | —               | —             |
| form            | 0.028         | 0.029        | 0.000        | 0.000       | <b>0.714</b> | 0.000        | 0.000        | 0.014        | 0.000        | 0.000        | 0.000        | 0.086         | 0.014        | 0.000           | 0.029           | 0.100         |
| handwritten     | 0.028         | 0.051        | 0.006        | 0.045       | 0.034        | <b>0.358</b> | 0.000        | 0.063        | 0.063        | 0.006        | 0.074        | 0.034         | 0.068        | 0.006           | 0.148           | 0.017         |
| invoice         | 0.018         | 0.123        | 0.018        | 0.000       | 0.123        | 0.000        | <b>0.421</b> | 0.070        | 0.018        | 0.000        | 0.053        | 0.018         | 0.000        | 0.000           | 0.035           | 0.018         |
| letter          | 0.007         | 0.000        | 0.053        | 0.000       | 0.007        | 0.000        | 0.000        | <b>0.803</b> | 0.000        | 0.000        | 0.033        | 0.000         | 0.046        | 0.000           | 0.033           | 0.000         |
| memo            | 0.043         | 0.000        | 0.064        | 0.000       | 0.021        | 0.000        | 0.000        | 0.000        | <b>0.511</b> | 0.021        | 0.170        | 0.000         | 0.043        | 0.000           | 0.106           | 0.021         |
| news_article    | 0.221         | 0.023        | 0.023        | 0.035       | 0.012        | 0.000        | 0.000        | 0.000        | 0.000        | <b>0.570</b> | <b>0.047</b> | 0.000         | 0.000        | 0.058           | 0.000           | 0.012         |
| presentation    | —             | —            | —            | —           | —            | —            | —            | —            | —            | —            | —            | —             | —            | —               | —               | —             |
| questionnaire   | 0.000         | 0.051        | 0.000        | 0.000       | 0.103        | 0.000        | 0.000        | 0.000        | 0.026        | 0.000        | 0.000        | <b>0.641</b>  | 0.026        | 0.000           | 0.103           | 0.026         |
| resume          | 0.027         | 0.027        | 0.033        | 0.005       | 0.023        | 0.000        | 0.005        | 0.011        | 0.000        | 0.011        | 0.049        | 0.054         | <b>0.674</b> | 0.033           | 0.027           | 0.016         |
| scientific_pub. | 0.000         | 0.000        | 0.000        | 0.000       | 0.051        | 0.000        | 0.000        | 0.000        | 0.000        | 0.000        | 0.000        | 0.000         | 0.000        | <b>0.949</b>    | 0.000           | 0.000         |
| scientific_rep. | —             | —            | —            | —           | —            | —            | —            | —            | —            | —            | —            | —             | —            | —               | —               | —             |
| specification   | 0.180         | 0.033        | 0.016        | 0.049       | 0.148        | 0.000        | 0.049        | 0.000        | 0.000        | 0.000        | 0.098        | 0.082         | 0.033        | 0.082           | <b>0.082</b>    | <b>0.148</b>  |



Table 10: Confusion matrix for GoogLeNet on the RVL-CDIP-*N* data. True labels are rows, and predicted labels are columns.

|                 | advertisement | budget | email | file_folder | form  | handwritten | invoice | letter | memo  | news_article | presentation | questionnaire | resume | scientific_pub. | scientific_rep. | specification |
|-----------------|---------------|--------|-------|-------------|-------|-------------|---------|--------|-------|--------------|--------------|---------------|--------|-----------------|-----------------|---------------|
| advertisement   | 0.000         | 0.776  | 0.052 | 0.000       | 0.052 | 0.000       | 0.017   | 0.000  | 0.000 | 0.000        | 0.000        | 0.069         | 0.000  | 0.000           | 0.052           | 0.000         |
| budget          | 0.000         | 0.000  | 0.818 | 0.000       | 0.000 | 0.000       | 0.000   | 0.000  | 0.000 | 0.000        | 0.000        | 0.000         | 0.091  | 0.000           | 0.061           | 0.030         |
| email           | 0.014         | 0.029  | 0.000 | 0.000       | 0.700 | 0.000       | 0.000   | 0.000  | 0.000 | 0.000        | 0.000        | 0.0129        | 0.029  | 0.000           | 0.000           | 0.086         |
| file_folder     | 0.017         | 0.067  | 0.017 | 0.051       | 0.023 | 0.449       | 0.006   | 0.051  | 0.057 | 0.006        | 0.034        | 0.017         | 0.074  | 0.011           | 0.125           | 0.000         |
| form            | 0.000         | 0.070  | 0.000 | 0.000       | 0.211 | 0.000       | 0.439   | 0.088  | 0.018 | 0.000        | 0.035        | 0.018         | 0.053  | 0.000           | 0.070           | 0.000         |
| handwritten     | 0.000         | 0.000  | 0.013 | 0.007       | 0.000 | 0.000       | 0.000   | 0.816  | 0.020 | 0.007        | 0.033        | 0.000         | 0.072  | 0.000           | 0.020           | 0.007         |
| invoice         | 0.000         | 0.021  | 0.021 | 0.000       | 0.021 | 0.000       | 0.000   | 0.085  | 0.553 | 0.021        | 0.064        | 0.000         | 0.213  | 0.000           | 0.000           | 0.000         |
| letter          | 0.279         | 0.000  | 0.000 | 0.012       | 0.000 | 0.012       | 0.000   | 0.000  | 0.000 | 0.616        | 0.024        | 0.000         | 0.000  | 0.035           | 0.000           | 0.023         |
| memo            | 0.000         | 0.103  | 0.026 | 0.000       | 0.026 | 0.000       | 0.000   | 0.026  | 0.000 | 0.000        | 0.051        | 0.513         | 0.128  | 0.000           | 0.0103          | 0.026         |
| news_article    | 0.011         | 0.011  | 0.027 | 0.000       | 0.038 | 0.000       | 0.000   | 0.000  | 0.005 | 0.038        | 0.082        | 0.098         | 0.609  | 0.109           | 0.049           | 0.023         |
| presentation    | 0.000         | 0.000  | 0.000 | 0.000       | 0.000 | 0.000       | 0.000   | 0.000  | 0.026 | 0.000        | 0.026        | 0.000         | 0.000  | 0.923           | 0.026           | 0.000         |
| questionnaire   | 0.000         | 0.000  | 0.000 | 0.000       | 0.000 | 0.000       | 0.000   | 0.000  | 0.000 | 0.000        | 0.000        | 0.000         | 0.000  | 0.000           | 0.000           | 0.000         |
| resume          | 0.115         | 0.115  | 0.000 | 0.016       | 0.148 | 0.000       | 0.033   | 0.016  | 0.000 | 0.033        | 0.082        | 0.016         | 0.082  | 0.164           | 0.066           | 0.115         |
| scientific_pub. |               |        |       |             |       |             |         |        |       |              |              |               |        |                 |                 |               |
| scientific_rep. |               |        |       |             |       |             |         |        |       |              |              |               |        |                 |                 |               |
| specification   |               |        |       |             |       |             |         |        |       |              |              |               |        |                 |                 |               |

Table 11: Confusion matrix for AlexNet on the RVL-CDIP-*N* data. True labels are rows, and predicted labels are columns.

|                 | advertisement | budget | email | file_folder | form  | handwritten | invoice | letter | memo  | news_article | presentation | questionnaire | resume | scientific_pub. | scientific_rep. | specification |
|-----------------|---------------|--------|-------|-------------|-------|-------------|---------|--------|-------|--------------|--------------|---------------|--------|-----------------|-----------------|---------------|
| advertisement   | 0.000         | 0.690  | 0.017 | 0.034       | 0.052 | 0.000       | 0.034   | 0.000  | 0.000 | 0.000        | 0.000        | 0.052         | 0.017  | 0.017           | 0.052           | 0.034         |
| budget          | 0.091         | 0.061  | 0.727 | 0.000       | 0.000 | 0.000       | 0.000   | 0.000  | 0.000 | 0.030        | 0.000        | 0.000         | 0.060  | 0.000           | 0.000           | 0.030         |
| email           | 0.029         | 0.071  | 0.000 | 0.000       | 0.443 | 0.000       | 0.071   | 0.029  | 0.029 | 0.000        | 0.014        | 0.071         | 0.071  | 0.000           | 0.000           | 0.171         |
| file_folder     | 0.034         | 0.051  | 0.000 | 0.051       | 0.023 | 0.352       | 0.023   | 0.159  | 0.091 | 0.006        | 0.040        | 0.011         | 0.017  | 0.000           | 0.142           | 0.000         |
| form            | 0.000         | 0.105  | 0.000 | 0.000       | 0.175 | 0.000       | 0.526   | 0.123  | 0.000 | 0.000        | 0.000        | 0.035         | 0.035  | 0.000           | 0.000           | 0.000         |
| handwritten     | 0.013         | 0.000  | 0.039 | 0.000       | 0.000 | 0.000       | 0.000   | 0.836  | 0.007 | 0.000        | 0.007        | 0.000         | 0.079  | 0.007           | 0.013           | 0.000         |
| invoice         | 0.021         | 0.021  | 0.085 | 0.000       | 0.085 | 0.000       | 0.085   | 0.000  | 0.404 | 0.000        | 0.043        | 0.043         | 0.213  | 0.021           | 0.043           | 0.000         |
| letter          | 0.302         | 0.116  | 0.000 | 0.023       | 0.000 | 0.023       | 0.000   | 0.000  | 0.000 | 0.558        | 0.000        | 0.000         | 0.000  | 0.058           | 0.023           | 0.000         |
| memo            | 0.051         | 0.000  | 0.026 | 0.000       | 0.026 | 0.000       | 0.026   | 0.000  | 0.000 | 0.000        | 0.026        | 0.487         | 0.128  | 0.000           | 0.154           | 0.026         |
| news_article    | 0.033         | 0.022  | 0.038 | 0.000       | 0.038 | 0.000       | 0.005   | 0.005  | 0.005 | 0.005        | 0.033        | 0.016         | 0.663  | 0.033           | 0.065           | 0.043         |
| presentation    | 0.000         | 0.000  | 0.000 | 0.000       | 0.026 | 0.000       | 0.000   | 0.000  | 0.000 | 0.000        | 0.000        | 0.000         | 0.000  | 0.949           | 0.026           | 0.000         |
| questionnaire   | 0.000         | 0.000  | 0.000 | 0.000       | 0.000 | 0.000       | 0.000   | 0.000  | 0.000 | 0.000        | 0.000        | 0.000         | 0.000  | 0.000           | 0.000           | 0.000         |
| resume          | 0.115         | 0.115  | 0.016 | 0.016       | 0.016 | 0.016       | 0.131   | 0.016  | 0.000 | 0.033        | 0.033        | 0.016         | 0.016  | 0.131           | 0.033           | 0.148         |
| scientific_pub. |               |        |       |             |       |             |         |        |       |              |              |               |        |                 |                 |               |
| scientific_rep. |               |        |       |             |       |             |         |        |       |              |              |               |        |                 |                 |               |
| specification   |               |        |       |             |       |             |         |        |       |              |              |               |        |                 |                 |               |

Table 12: Confusion matrix for LayoutLMv2 on the RVL-CDIP-*N* data. True labels are rows, and predicted labels are columns.

|                 | advertisement | budget | email | file_folder | form  | handwritten | invoice | letter | memo  | news_article | presentation | questionnaire | resume | scientific_pub. | scientific_rep. | specification |
|-----------------|---------------|--------|-------|-------------|-------|-------------|---------|--------|-------|--------------|--------------|---------------|--------|-----------------|-----------------|---------------|
| advertisement   | 0.000         | 0.897  | 0.017 | 0.017       | 0.000 | 0.000       | 0.000   | 0.000  | 0.000 | 0.000        | 0.000        | 0.052         | 0.017  | 0.000           | 0.000           | 0.000         |
| budget          | 0.000         | 0.000  | 0.848 | 0.000       | 0.000 | 0.000       | 0.000   | 0.000  | 0.000 | 0.000        | 0.030        | 0.030         | 0.061  | 0.000           | 0.000           | 0.000         |
| email           | 0.014         | 0.271  | 0.000 | 0.014       | 0.529 | 0.000       | 0.000   | 0.000  | 0.000 | 0.000        | 0.000        | 0.086         | 0.043  | 0.000           | 0.000           | 0.043         |
| file_folder     | 0.125         | 0.097  | 0.011 | 0.045       | 0.028 | 0.261       | 0.006   | 0.216  | 0.000 | 0.000        | 0.068        | 0.017         | 0.034  | 0.006           | 0.080           | 0.006         |
| form            | 0.000         | 0.509  | 0.000 | 0.000       | 0.070 | 0.000       | 0.333   | 0.000  | 0.000 | 0.000        | 0.035        | 0.018         | 0.035  | 0.000           | 0.000           | 0.000         |
| handwritten     | 0.007         | 0.007  | 0.026 | 0.000       | 0.000 | 0.007       | 0.000   | 0.836  | 0.007 | 0.000        | 0.046        | 0.000         | 0.039  | 0.000           | 0.026           | 0.000         |
| invoice         | 0.021         | 0.043  | 0.043 | 0.000       | 0.021 | 0.000       | 0.106   | 0.511  | 0.021 | 0.128        | 0.043        | 0.043         | 0.043  | 0.000           | 0.021           | 0.000         |
| letter          | 0.290         | 0.023  | 0.000 | 0.000       | 0.000 | 0.000       | 0.000   | 0.000  | 0.000 | 0.512        | 0.012        | 0.000         | 0.012  | 0.140           | 0.012           | 0.000         |
| memo            | 0.000         | 0.128  | 0.000 | 0.000       | 0.000 | 0.000       | 0.000   | 0.000  | 0.000 | 0.000        | 0.051        | 0.769         | 0.051  | 0.000           | 0.000           | 0.000         |
| news_article    | 0.065         | 0.082  | 0.023 | 0.000       | 0.023 | 0.000       | 0.000   | 0.000  | 0.000 | 0.000        | 0.087        | 0.076         | 0.565  | 0.016           | 0.033           | 0.033         |
| presentation    | 0.026         | 0.000  | 0.000 | 0.000       | 0.000 | 0.000       | 0.000   | 0.000  | 0.000 | 0.000        | 0.000        | 0.000         | 0.026  | 0.923           | 0.000           | 0.026         |
| questionnaire   | 0.000         | 0.000  | 0.000 | 0.000       | 0.000 | 0.000       | 0.000   | 0.000  | 0.000 | 0.000        | 0.000        | 0.000         | 0.000  | 0.000           | 0.000           | 0.000         |
| resume          | 0.115         | 0.115  | 0.016 | 0.016       | 0.016 | 0.016       | 0.131   | 0.016  | 0.000 | 0.033        | 0.033        | 0.016         | 0.016  | 0.131           | 0.033           | 0.148         |
| scientific_pub. |               |        |       |             |       |             |         |        |       |              |              |               |        |                 |                 |               |
| scientific_rep. |               |        |       |             |       |             |         |        |       |              |              |               |        |                 |                 |               |
| specification   |               |        |       |             |       |             |         |        |       |              |              |               |        |                 |                 |               |

Table 13: Confusion matrix for DiT on the RVL-CDIP- $N$  data. True labels are rows, and predicted labels are columns.

|                 | advertisement | budget       | email        | file_folder | form         | handwritten  | invoice      | letter | memo         | news_article | presentation | questionnaire | resume | scientific_pub. | scientific_rep. | specification |
|-----------------|---------------|--------------|--------------|-------------|--------------|--------------|--------------|--------|--------------|--------------|--------------|---------------|--------|-----------------|-----------------|---------------|
| advertisement   | —             | —            | —            | —           | —            | —            | —            | —      | —            | —            | —            | —             | —      | —               | —               | —             |
| budget          | 0.017         | <b>0.862</b> | —            | —           | —            | —            | —            | —      | —            | —            | —            | —             | —      | —               | —               | —             |
| email           | 0.000         | 0.000        | <b>0.970</b> | 0.000       | 0.034        | 0.000        | 0.000        | 0.000  | 0.000        | 0.017        | 0.000        | 0.000         | 0.000  | 0.000           | 0.052           | 0.000         |
| file_folder     | —             | —            | —            | —           | —            | —            | —            | —      | —            | —            | —            | —             | —      | —               | —               | —             |
| form            | 0.000         | 0.029        | 0.029        | 0.000       | <b>0.914</b> | 0.000        | 0.000        | 0.000  | 0.000        | 0.000        | 0.00         | 0.029         | 0.000  | 0.000           | 0.000           | 0.000         |
| handwritten     | 0.000         | 0.017        | 0.006        | 0.011       | 0.034        | <b>0.642</b> | 0.011        | 0.085  | 0.057        | 0.006        | 0.085        | 0.006         | 0.000  | 0.000           | 0.040           | 0.000         |
| invoice         | 0.018         | 0.035        | 0.035        | 0.000       | 0.035        | 0.000        | <b>0.860</b> | 0.000  | 0.000        | 0.000        | 0.000        | 0.000         | 0.000  | 0.000           | 0.018           | 0.000         |
| letter          | 0.013         | 0.000        | 0.007        | 0.000       | 0.000        | 0.000        | <b>0.954</b> | 0.000  | 0.000        | 0.026        | 0.000        | 0.000         | 0.000  | 0.000           | 0.000           | 0.000         |
| memo            | 0.000         | 0.000        | 0.064        | 0.000       | 0.021        | 0.000        | 0.000        | 0.149  | <b>0.723</b> | 0.000        | 0.021        | 0.000         | 0.000  | 0.000           | 0.021           | 0.000         |
| news_article    | 0.105         | 0.000        | 0.012        | 0.000       | 0.000        | 0.000        | 0.000        | 0.012  | 0.000        | <b>0.849</b> | 0.012        | 0.000         | 0.000  | 0.012           | 0.000           | 0.000         |
| presentation    | —             | —            | —            | —           | —            | —            | —            | —      | —            | —            | —            | —             | —      | —               | —               | —             |
| questionnaire   | 0.000         | 0.000        | 0.000        | 0.000       | 0.103        | 0.000        | 0.000        | 0.000  | 0.000        | 0.000        | <b>0.821</b> | 0.000         | 0.000  | 0.000           | 0.077           | 0.000         |
| resume          | 0.022         | 0.000        | 0.049        | 0.000       | 0.005        | 0.000        | 0.000        | 0.000  | 0.000        | 0.016        | 0.005        | <b>0.734</b>  | 0.038  | 0.076           | 0.054           | 0.000         |
| scientific_pub. | 0.000         | 0.000        | 0.000        | 0.000       | 0.000        | 0.000        | 0.000        | 0.000  | 0.000        | 0.000        | 0.026        | 0.000         | 0.000  | <b>0.923</b>    | 0.051           | 0.000         |
| scientific_rep. | —             | —            | —            | —           | —            | —            | —            | —      | —            | —            | —            | —             | —      | —               | —               | —             |
| specification   | 0.115         | 0.066        | 0.000        | 0.000       | 0.230        | 0.000        | 0.000        | 0.000  | 0.000        | 0.016        | 0.016        | 0.000         | 0.000  | 0.000           | 0.148           | <b>0.410</b>  |

Table 14: AUC scores using MSP on RVL-CDIP versus RVL-CDIP- $O$  ( $T-O$ ).

| Model      | $T-O$ | $T-O$        | $T-O$ | $T-O$        |
|------------|-------|--------------|-------|--------------|
|            | micro | micro w/Aug. | macro | macro w/Aug. |
| VGG-16     | 0.881 | 0.867        | 0.895 | 0.883        |
| ResNet-50  | 0.849 | 0.852        | 0.871 | 0.879        |
| GoogLeNet  | 0.838 | 0.839        | 0.859 | 0.862        |
| AlexNet    | 0.871 | 0.882        | 0.889 | 0.895        |
| LayoutLMv2 | 0.842 | 0.832        | 0.875 | 0.878        |
| DiT-base   | 0.894 | 0.923        | 0.901 | 0.929        |

Table 15: AUC scores using MSP on RVL-CDIP- $N$  versus RVL-CDIP- $O$  ( $N-O$ ).

| Model      | $N-O$ | $N-O$        | $N-O$ | $N-O$        |
|------------|-------|--------------|-------|--------------|
|            | micro | micro w/Aug. | macro | macro w/Aug. |
| VGG-16     | 0.649 | 0.631        | 0.720 | 0.712        |
| ResNet-50  | 0.581 | 0.584        | 0.654 | 0.658        |
| GoogLeNet  | 0.592 | 0.592        | 0.679 | 0.647        |
| AlexNet    | 0.620 | 0.646        | 0.684 | 0.635        |
| LayoutLMv2 | 0.620 | 0.620        | 0.717 | 0.706        |
| DiT-base   | 0.728 | 0.777        | 0.780 | 0.754        |

Table 16: AUC scores using Energy on RVL-CDIP versus RVL-CDIP- $O$  ( $T-O$ ).

| Model      | $T-O$ | $T-O$        | $T-O$ | $T-O$        |
|------------|-------|--------------|-------|--------------|
|            | micro | micro w/Aug. | macro | macro w/Aug. |
| VGG-16     | 0.923 | 0.906        | 0.930 | 0.916        |
| ResNet-50  | 0.844 | 0.868        | 0.880 | 0.899        |
| GoogLeNet  | 0.847 | 0.854        | 0.869 | 0.878        |
| AlexNet    | 0.909 | 0.920        | 0.922 | 0.932        |
| LayoutLMv2 | 0.849 | 0.849        | 0.891 | 0.891        |
| DiT-base   | 0.888 | 0.933        | 0.902 | 0.936        |

Table 17: AUC scores using Energy on RVL-CDIP- $N$  versus RVL-CDIP- $O$  ( $N-O$ ).

| Model      | $N-O$ | $N-O$        | $N-O$ | $N-O$        |
|------------|-------|--------------|-------|--------------|
|            | micro | micro w/Aug. | macro | macro w/Aug. |
| VGG-16     | 0.645 | 0.646        | 0.720 | 0.707        |
| ResNet-50  | 0.554 | 0.583        | 0.661 | 0.671        |
| GoogLeNet  | 0.587 | 0.561        | 0.689 | 0.642        |
| AlexNet    | 0.646 | 0.628        | 0.706 | 0.655        |
| LayoutLMv2 | 0.643 | 0.643        | 0.699 | 0.684        |
| DiT-base   | 0.753 | 0.731        | 0.792 | 0.764        |

Table 18: FPR95 scores using MSP on RVL-CDIP versus RVL-CDIP- $O$  ( $T-O$ ).

| Model      | $T-O$ | $T-O$        | $T-O$ | $T-O$        |
|------------|-------|--------------|-------|--------------|
|            | micro | micro w/Aug. | macro | macro w/Aug. |
| VGG-16     | 0.649 | 0.657        | 0.530 | 0.543        |
| ResNet-50  | 0.731 | 0.733        | 0.649 | 0.599        |
| GoogLeNet  | 0.748 | 0.745        | 0.619 | 0.641        |
| AlexNet    | 0.702 | 0.664        | 0.592 | 0.582        |
| LayoutLMv2 | 0.717 | 0.717        | 0.590 | 0.590        |
| DiT-base   | 0.587 | 0.497        | 0.461 | 0.401        |

Table 19: FPR95 scores using MSP on RVL-CDIP- $N$  versus RVL-CDIP- $O$  ( $N-O$ ).

| Model      | $T-O$ | $T-O$        | $T-O$ | $T-O$        |
|------------|-------|--------------|-------|--------------|
|            | micro | micro w/Aug. | macro | macro w/Aug. |
| VGG-16     | 0.916 | 0.923        | 0.777 | 0.830        |
| ResNet-50  | 0.935 | 0.933        | 0.834 | 0.832        |
| GoogLeNet  | 0.946 | 0.933        | 0.842 | 0.862        |
| AlexNet    | 0.919 | 0.916        | 0.785 | 0.850        |
| LayoutLMv2 | 0.932 | 0.932        | 0.795 | 0.806        |
| DiT-base   | 0.847 | 0.886        | 0.650 | 0.707        |

Table 20: FPR95 scores using Energy on RVL-CDIP versus RVL-CDIP- $O$  ( $T-O$ ).

| Model      | $T-O$ | $T-O$        | $T-O$ | $T-O$        |
|------------|-------|--------------|-------|--------------|
|            | micro | micro w/Aug. | macro | macro w/Aug. |
| VGG-16     | 0.461 | 0.529        | 0.379 | 0.444        |
| ResNet-50  | 0.650 | 0.603        | 0.527 | 0.482        |
| GoogLeNet  | 0.665 | 0.654        | 0.559 | 0.566        |
| AlexNet    | 0.525 | 0.423        | 0.433 | 0.378        |
| LayoutLMv2 | 0.753 | 0.753        | 0.573 | 0.573        |
| DiT-base   | 0.688 | 0.375        | 0.415 | 0.336        |

Table 21: FPR95 scores using Energy on RVL-CDIP- $N$  versus RVL-CDIP- $O$  ( $N-O$ ).

| Model      | $T-O$ | $T-O$        | $T-O$ | $T-O$        |
|------------|-------|--------------|-------|--------------|
|            | micro | micro w/Aug. | macro | macro w/Aug. |
| VGG-16     | 0.924 | 0.895        | 0.796 | 0.812        |
| ResNet-50  | 0.942 | 0.935        | 0.784 | 0.850        |
| GoogLeNet  | 0.943 | 0.945        | 0.799 | 0.869        |
| AlexNet    | 0.937 | 0.931        | 0.779 | 0.847        |
| LayoutLMv2 | 0.939 | 0.939        | 0.801 | 0.806        |
| DiT-base   | 0.843 | 0.852        | 0.614 | 0.663        |

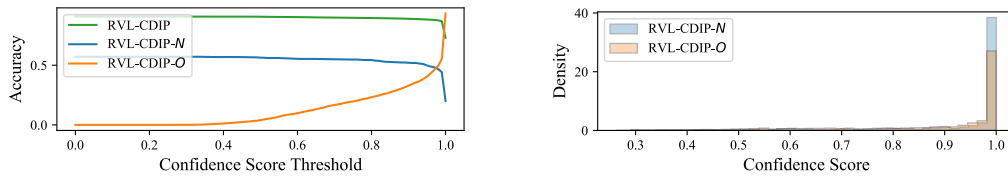

Figure 8: Relationship between confidence scores and accuracy (left) and distribution of confidence scores (right) for VGG-16 using MSP.

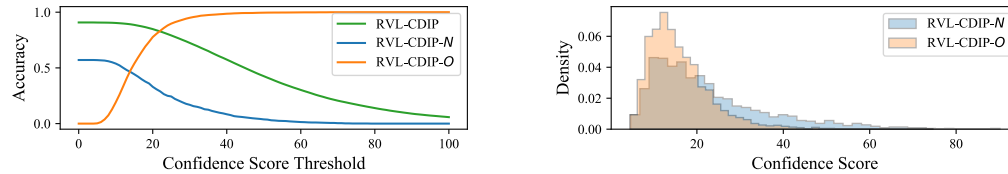

Figure 9: Relationship between confidence scores and accuracy (left) and distribution of confidence scores (right) for VGG-16 using Energy.

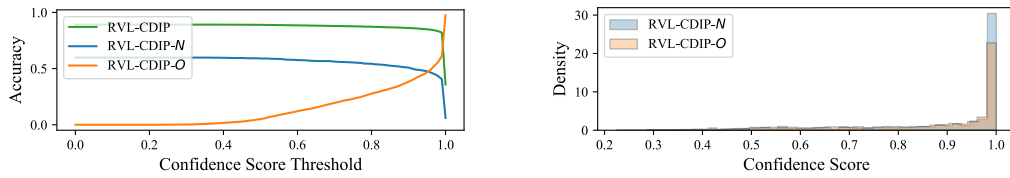

Figure 10: Relationship between confidence scores and accuracy (left) and distribution of confidence scores (right) for ResNet-50 using MSP.

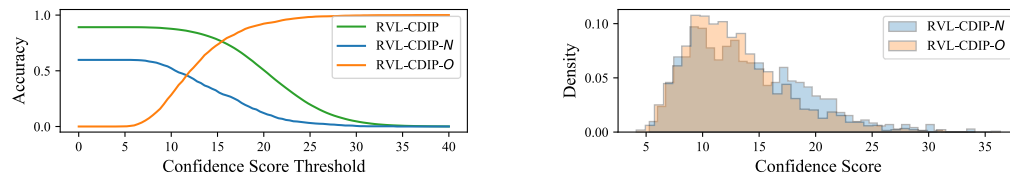

Figure 11: Relationship between confidence scores and accuracy (left) and distribution of confidence scores (right) for ResNet-50 using Energy.

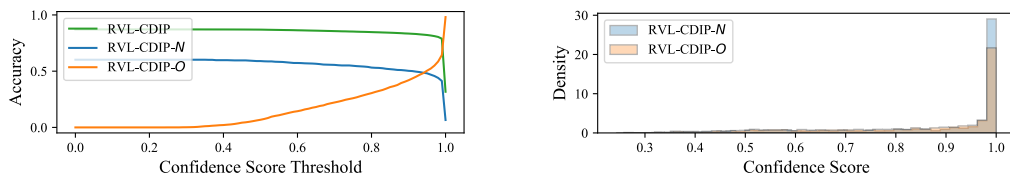

Figure 12: Relationship between confidence scores and accuracy (left) and distribution of confidence scores (right) for GoogLeNet using MSP.

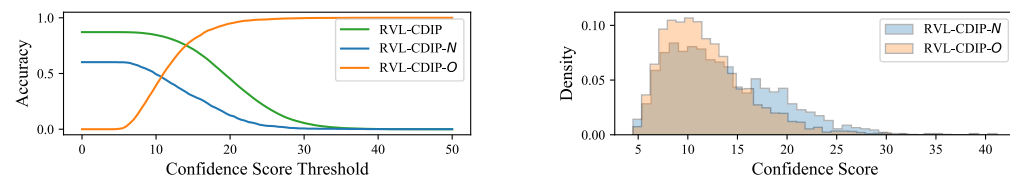

Figure 13: Relationship between confidence scores and accuracy (left) and distribution of confidence scores (right) for GoogLeNet using Energy.

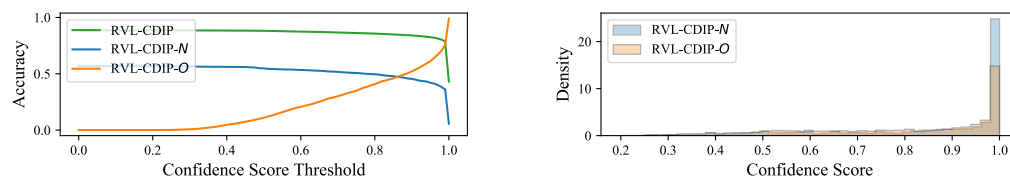

Figure 14: Relationship between confidence scores and accuracy (left) and distribution of confidence scores (right) for AlexNet using MSP.

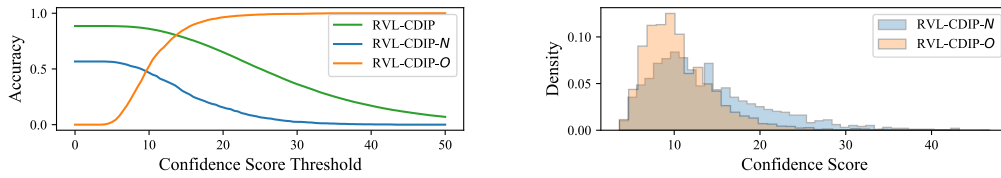

Figure 15: Relationship between confidence scores and accuracy (left) and distribution of confidence scores (right) for AlexNet using Energy.

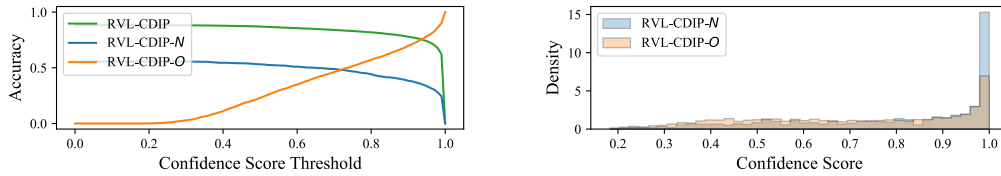

Figure 16: Relationship between confidence scores and accuracy (a) and distribution of confidence scores (b) for LayoutLMv2 using MSP.

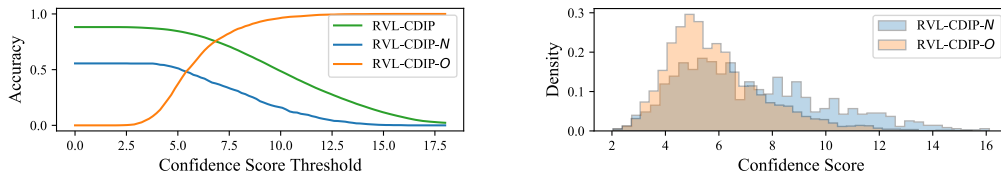

Figure 17: Relationship between confidence scores and accuracy (left) and distribution of confidence scores (right) for LayoutLMv2 using Energy.

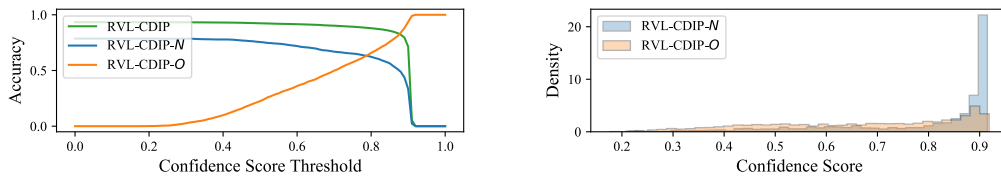

Figure 18: Relationship between confidence scores and accuracy (left) and distribution of confidence scores (right) for DiT using MSP.

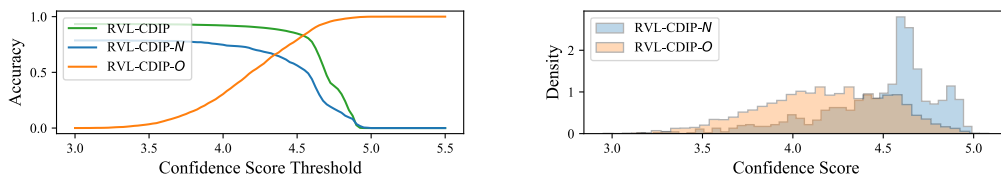

Figure 19: Relationship between confidence scores and accuracy (left) and distribution of confidence scores (right) for DiT using Energy.

## B Comparison of RVL-CDIP and RVL-CDIP-N

Figures 20–43 compare samples from RVL-CDIP with those from RVL-CDIP-N.

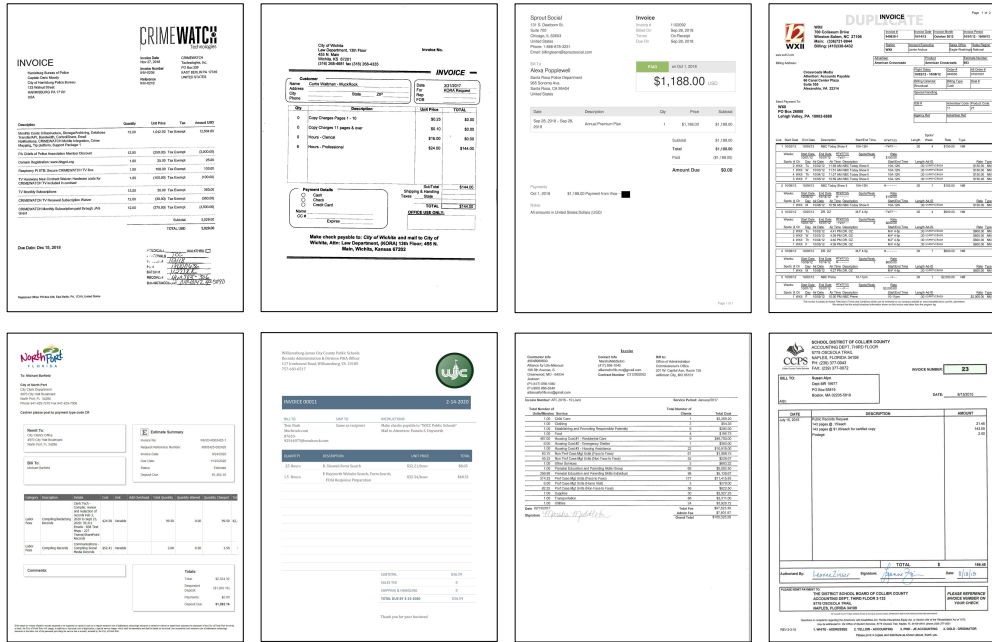

Figure 20: Samples of invoice documents from RVL-CDIP-N.

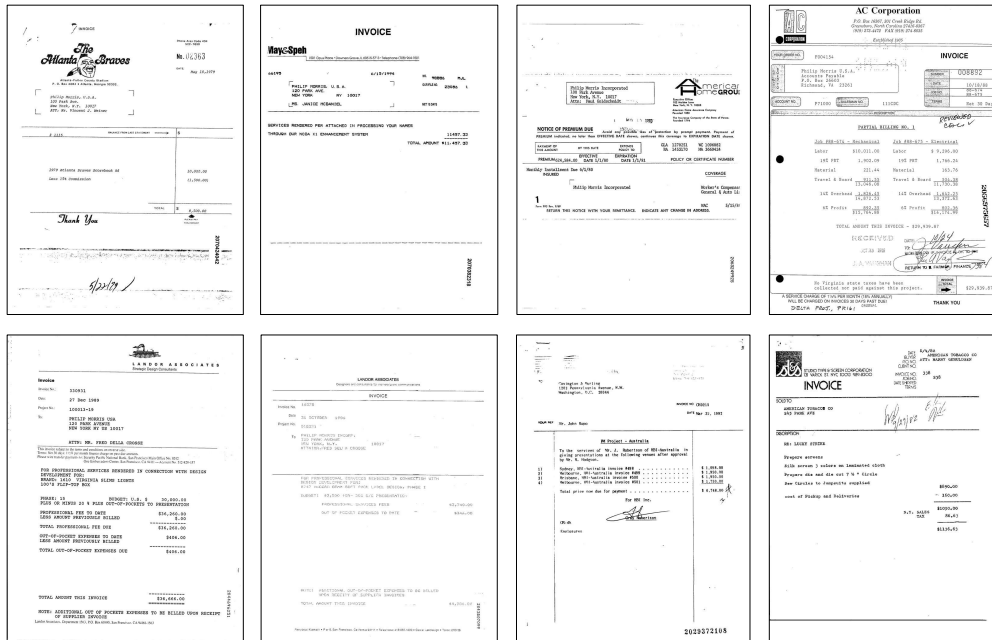

Figure 21: Samples of invoice documents from RVL-CDIP.

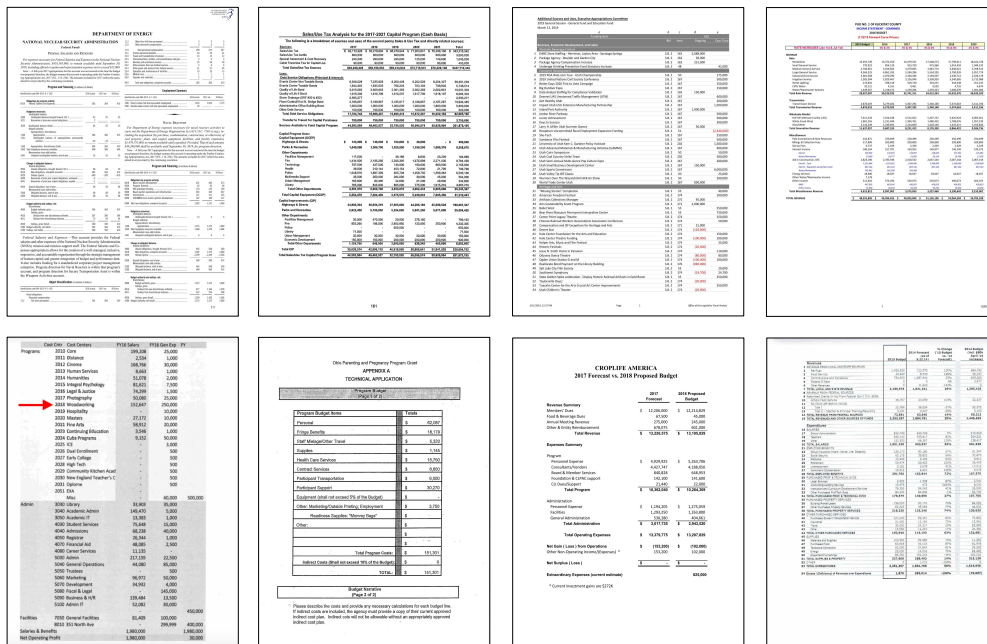

Figure 22: Samples of budget documents from RVL-CDIP-N.

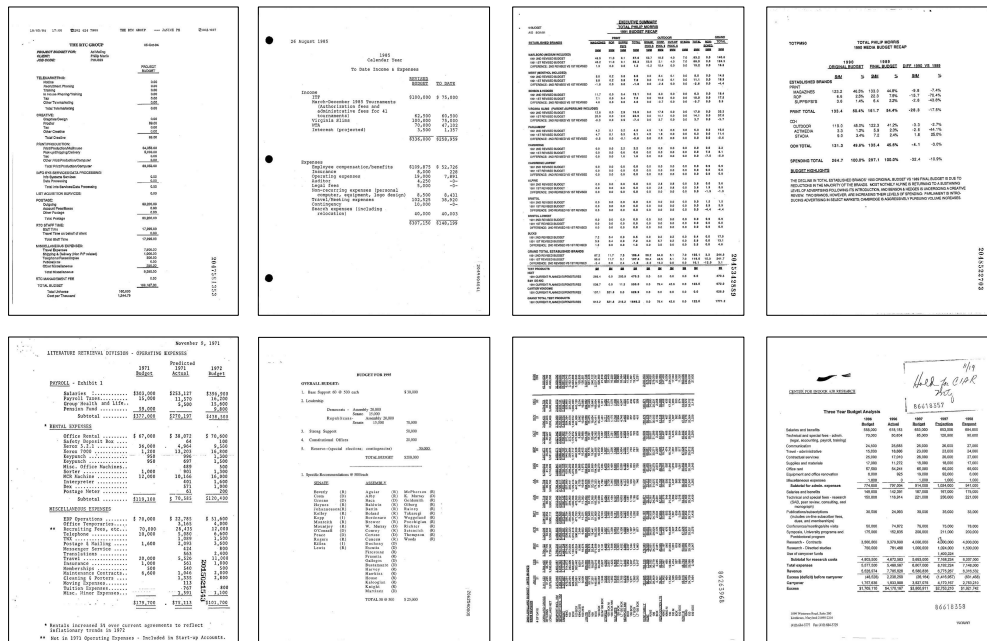

Figure 23: Samples of budget documents from RVL-CDIP.



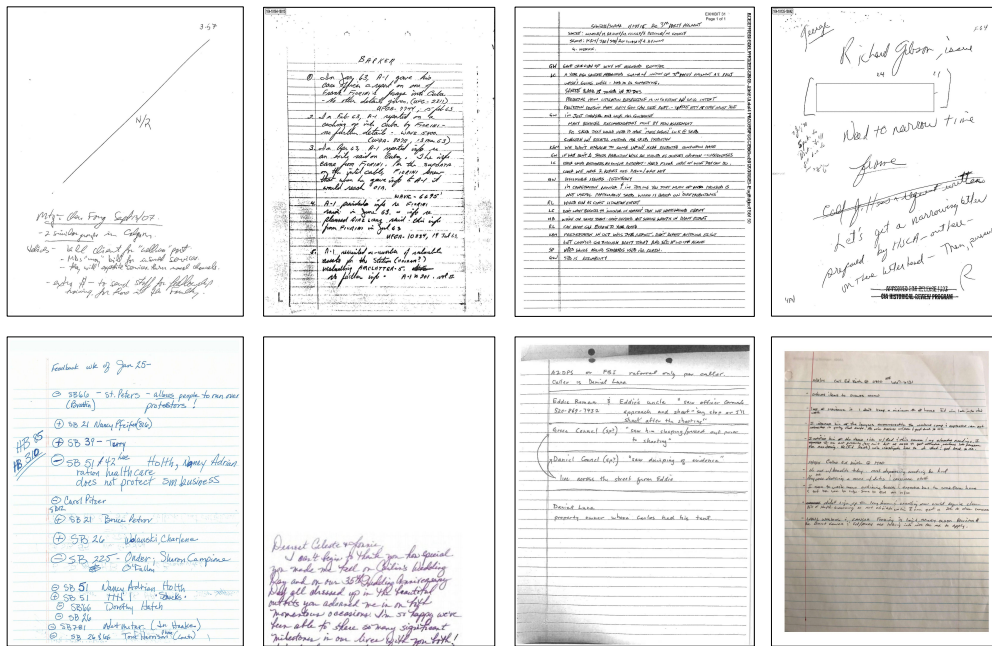

Figure 24: Samples of handwritten documents from RVL-CDIP-N.

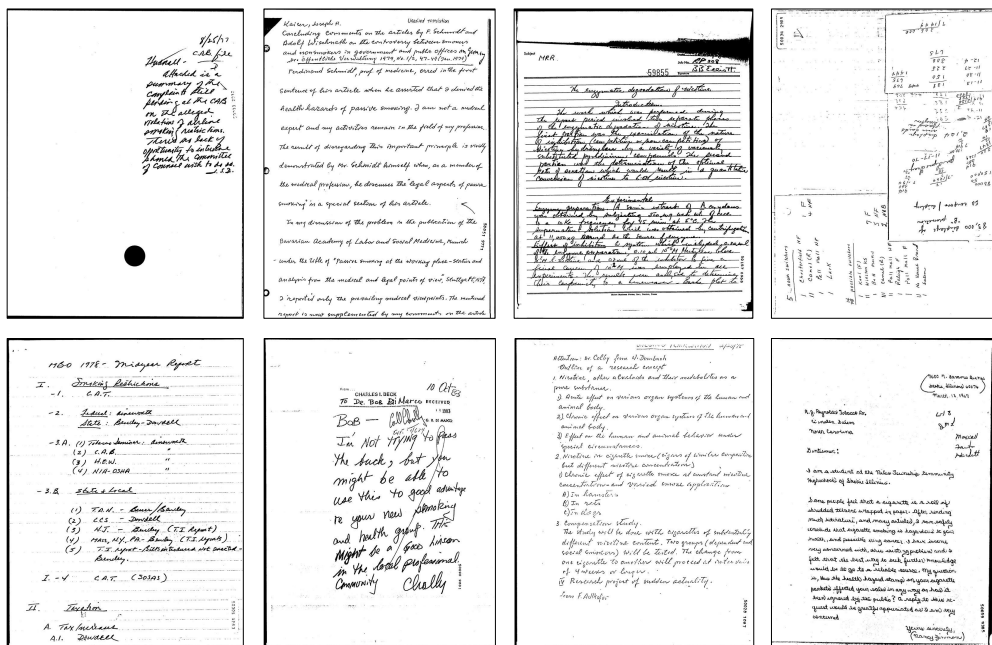

Figure 25: Samples of handwritten documents from RVL-CDIP.



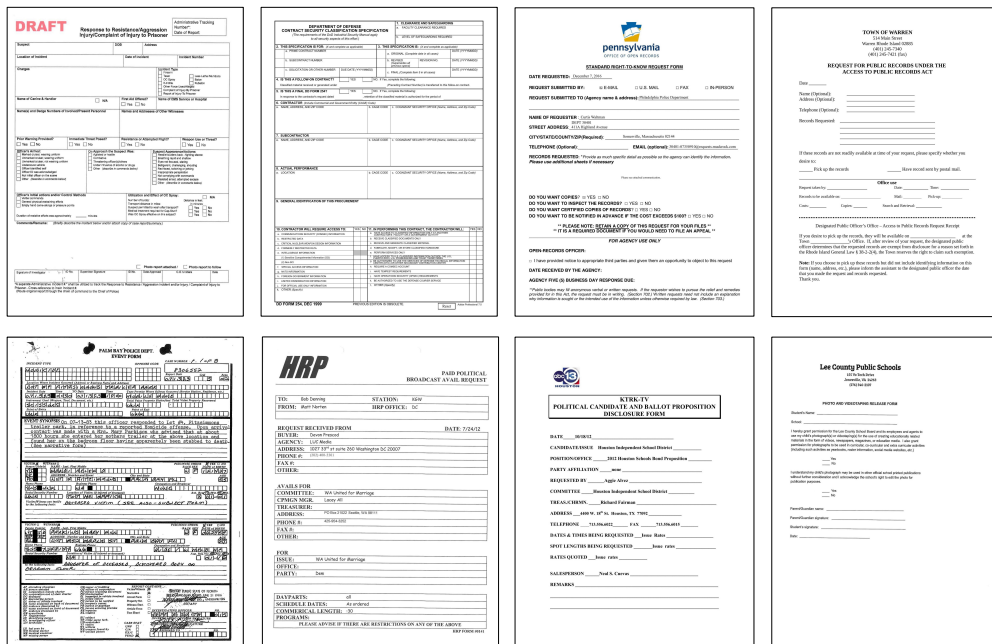

Figure 26: Samples of form documents from RVL-CDIP-N.

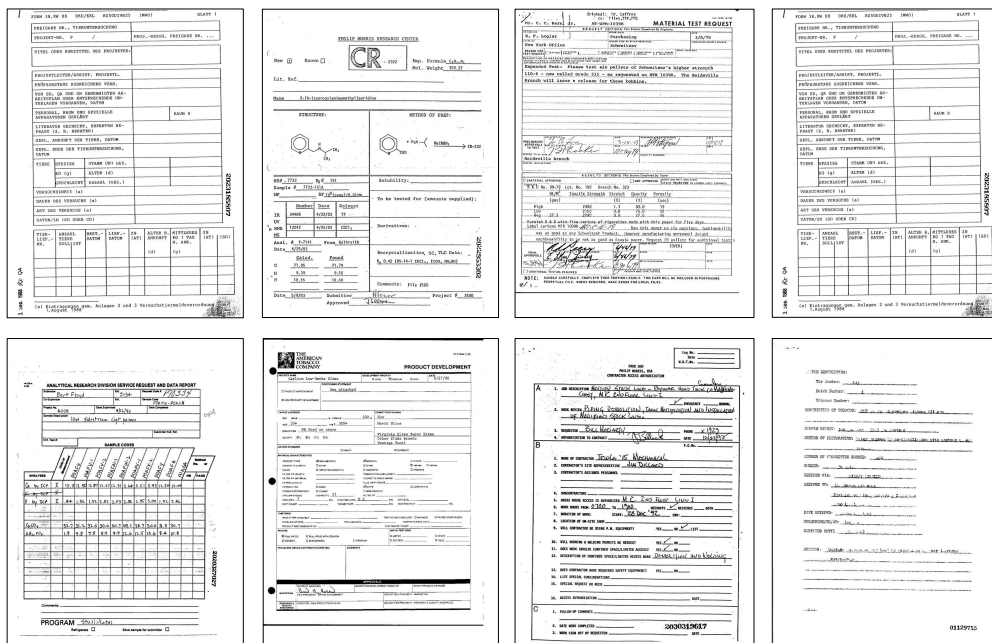

Figure 27: Samples of form documents from RVL-CDIP.

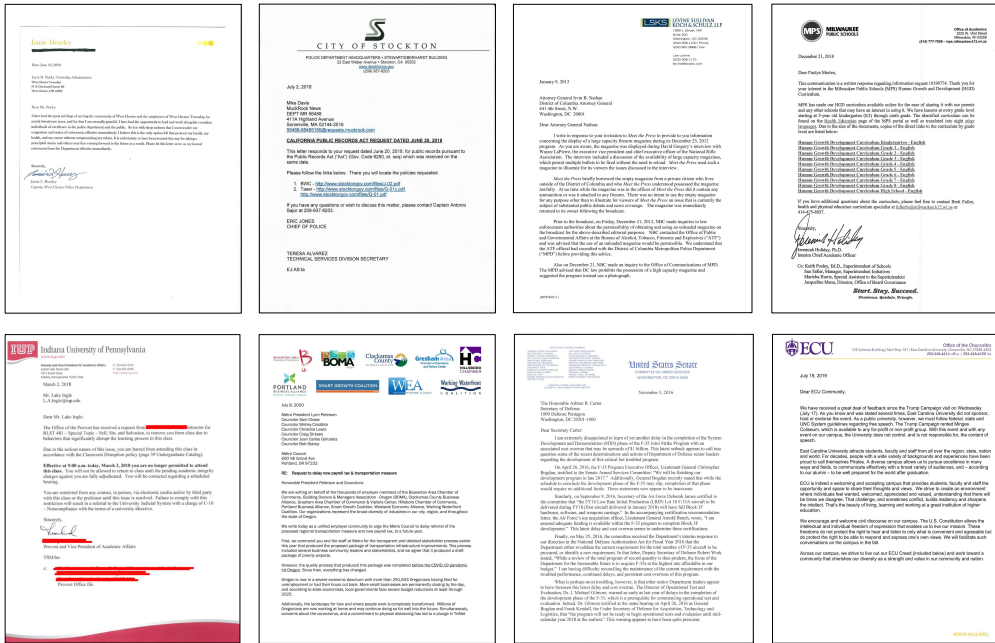

Figure 28: Samples of letter documents from RVL-CDIP-N.

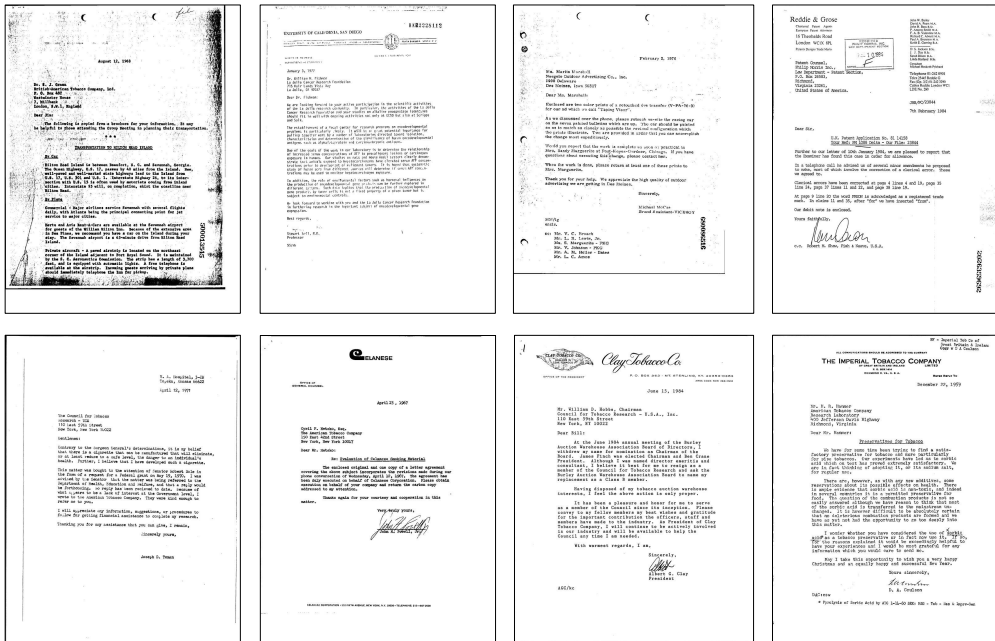

Figure 29: Samples of letter documents from RVL-CDIP.

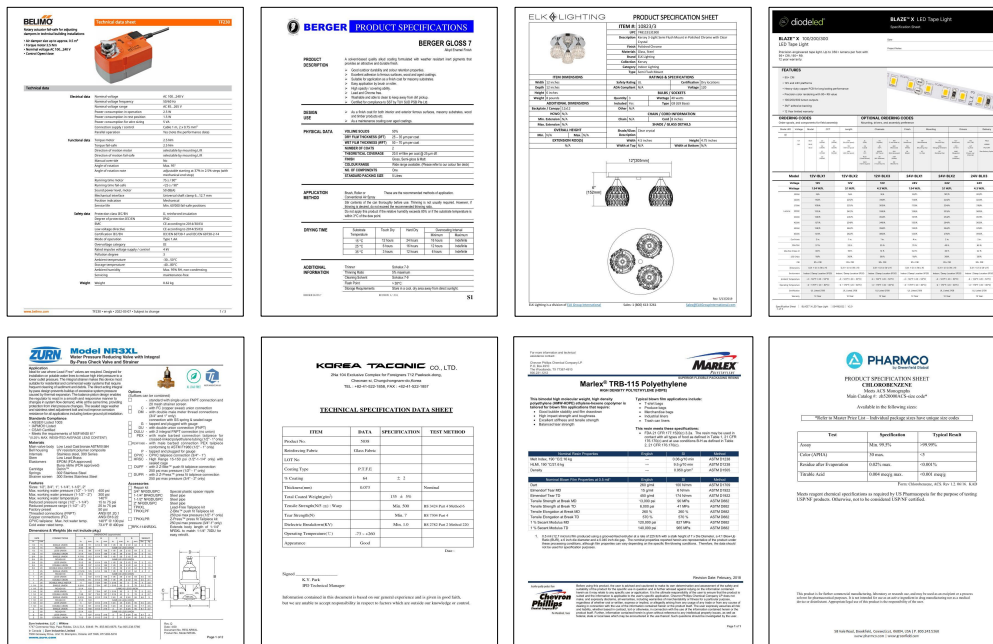

Figure 30: Samples of specification documents from RVL-CDIP-N.

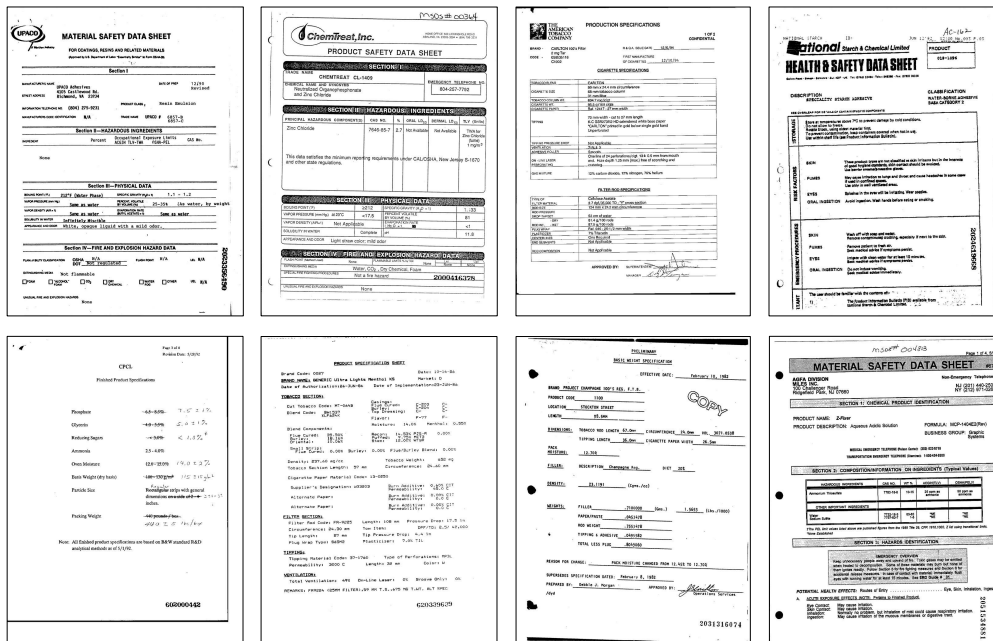

Figure 31: Samples of specification documents from RVL-CDIP.

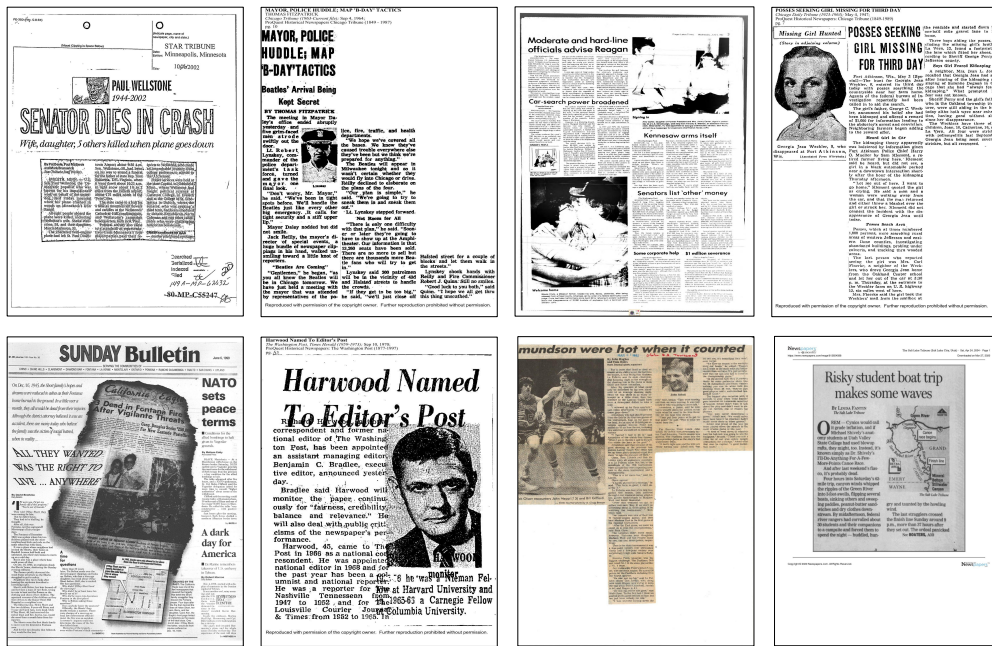

Figure 32: Samples of news\_article documents from RVL-CDIP-N.

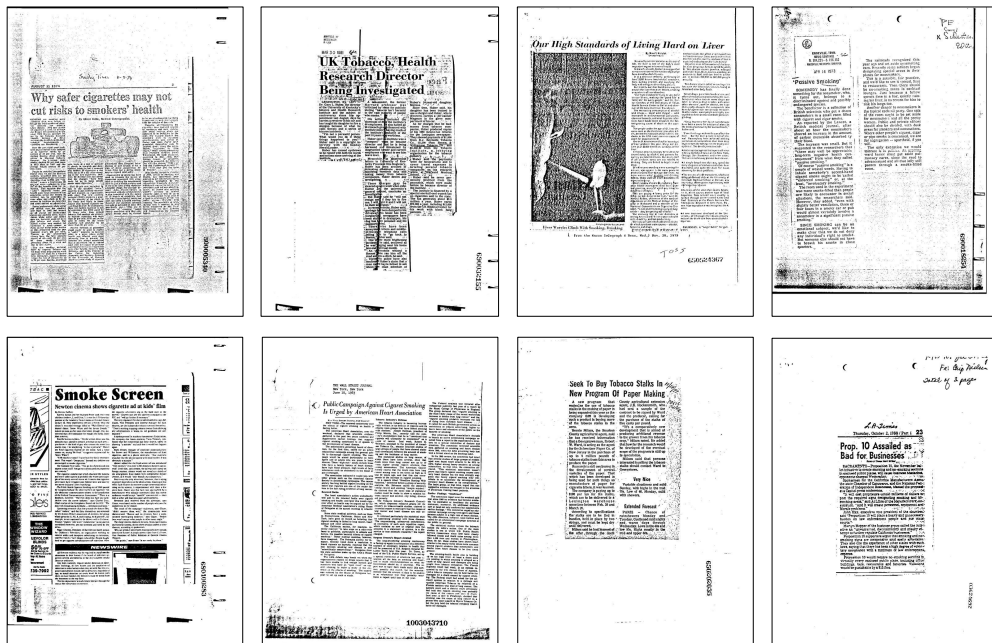

Figure 33: Samples of news\_article documents from RVL-CDIP.



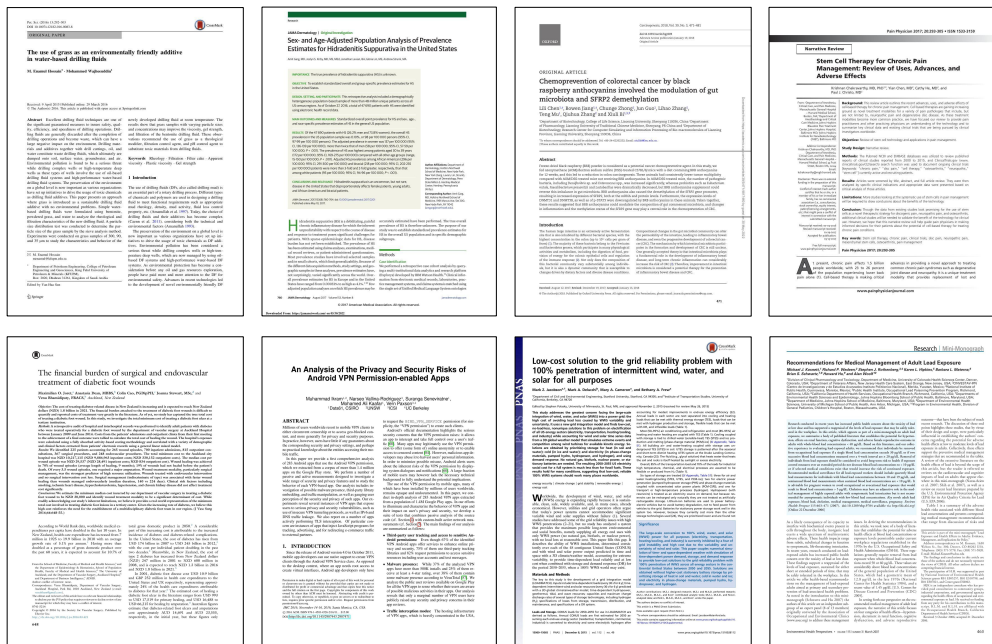

Figure 34: Samples of scientific\_publication documents from RVL-CDIP-N.

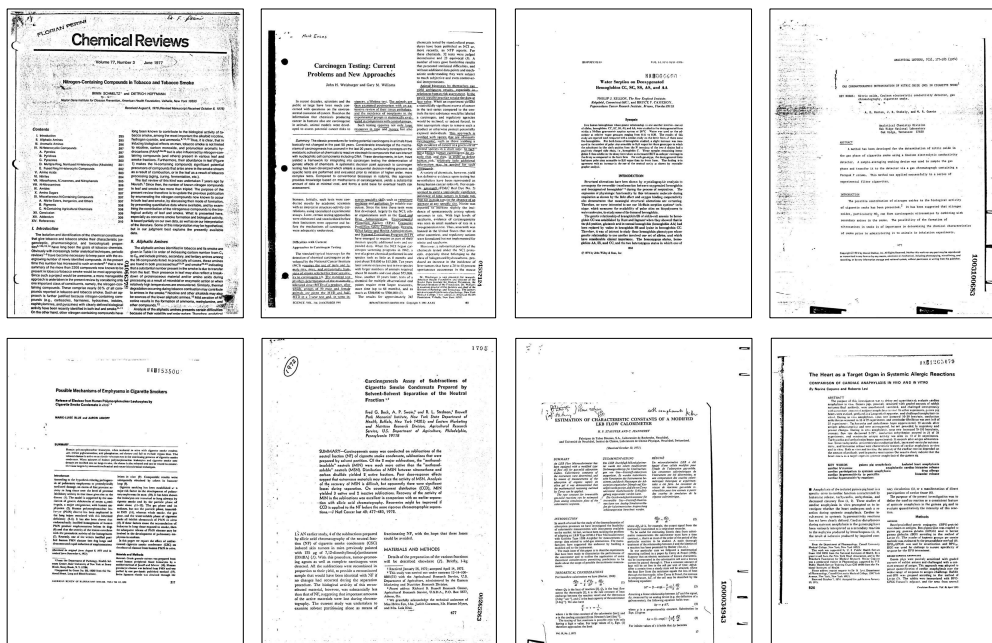

Figure 35: Samples of scientific\_publication documents from RVL-CDIP.

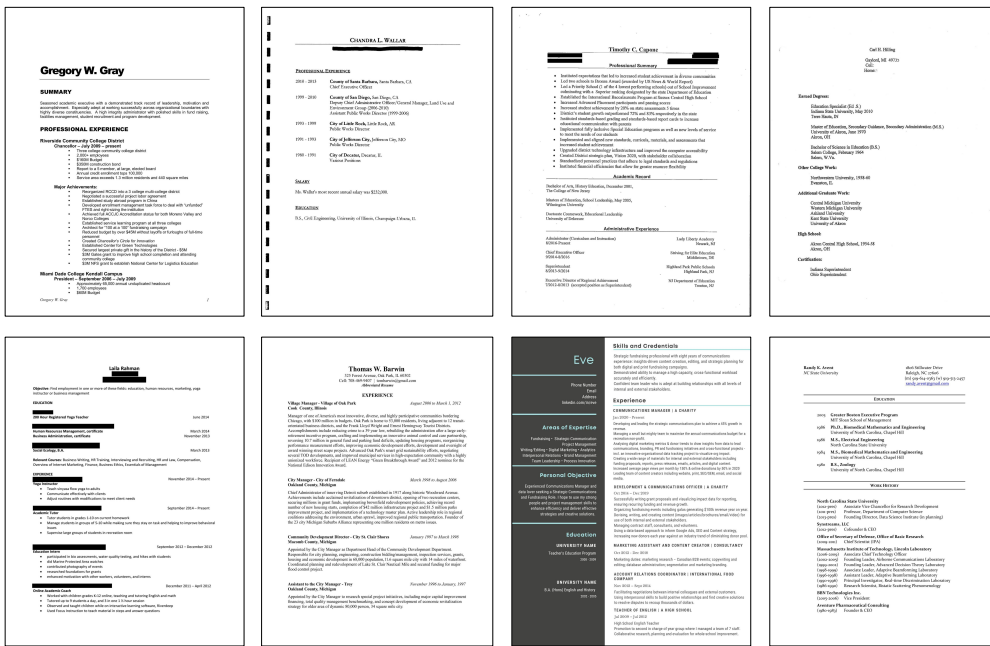

Figure 36: Samples of resume documents from RVL-CDIP-N.

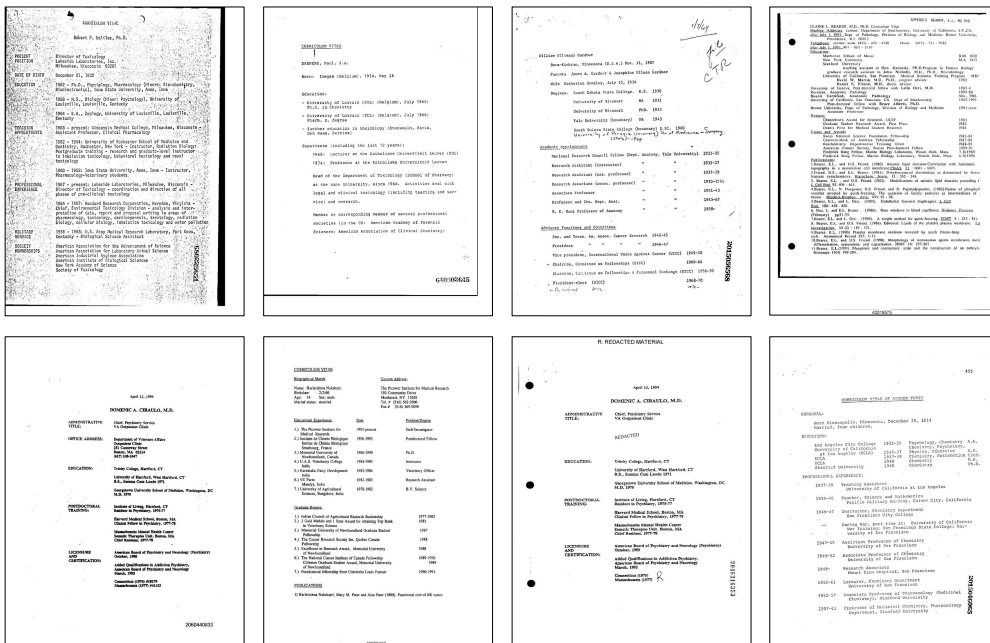

Figure 37: Samples of resume documents from RVL-CDIP.

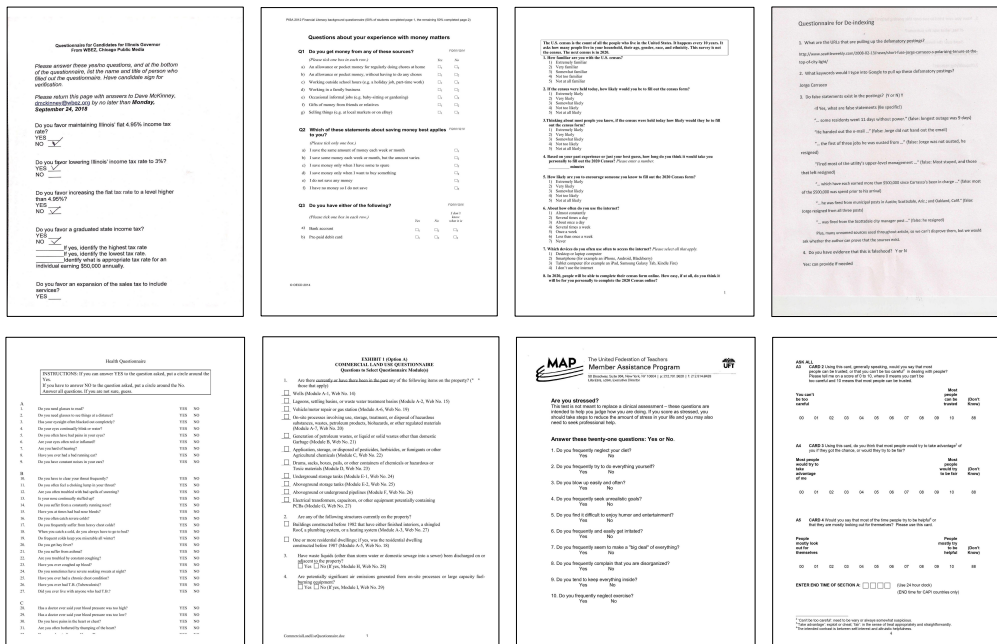

Figure 38: Samples of questionnaire documents from RVL-CDIP-N.

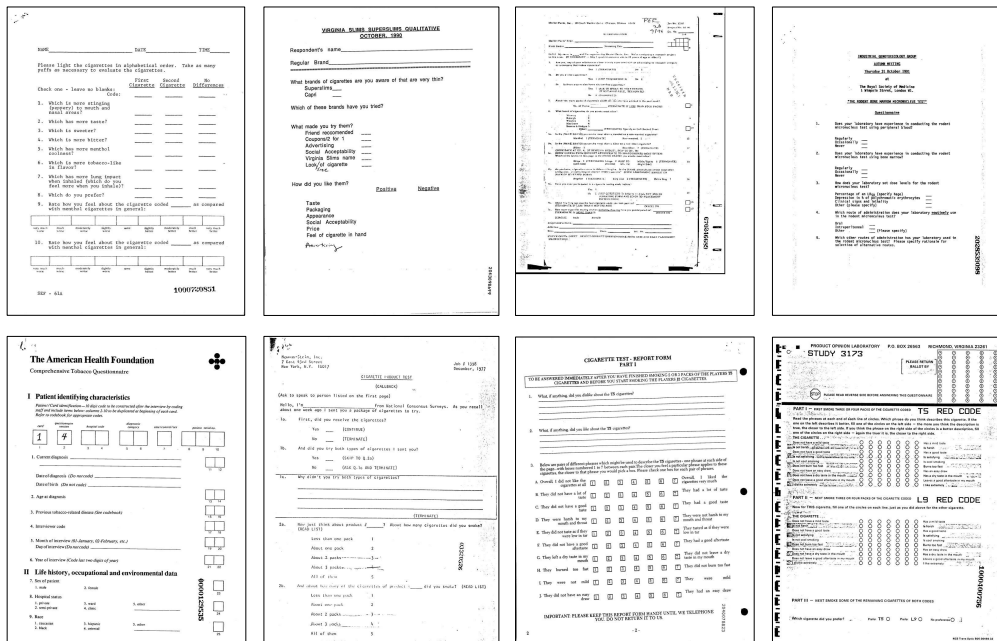

Figure 39: Samples of questionnaire documents from RVL-CDIP.

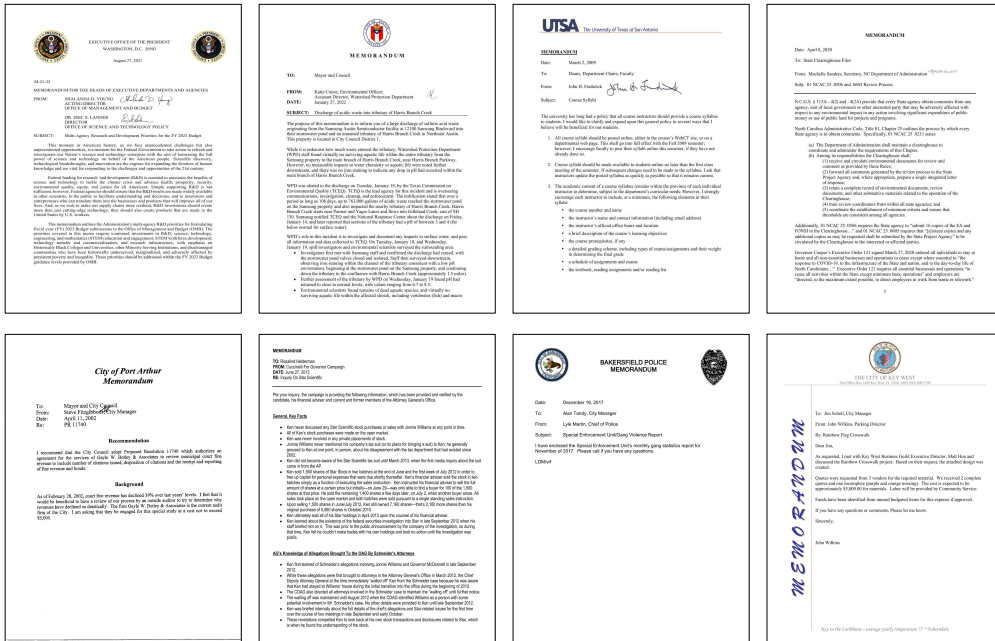

Figure 40: Samples of memo documents from RVL-CDIP-N.

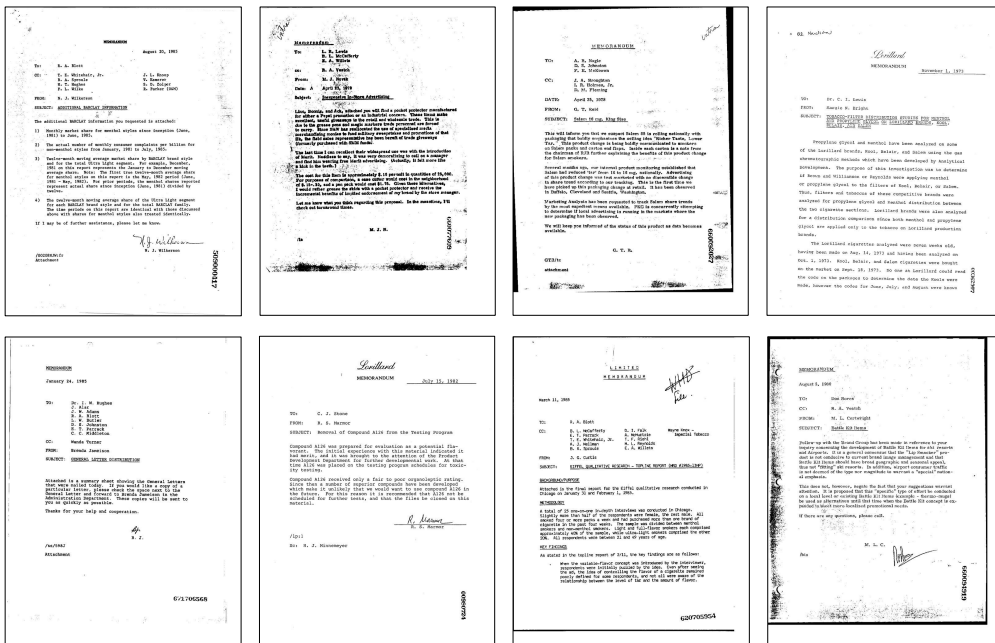

Figure 41: Samples of memo documents from RVL-CDIP.



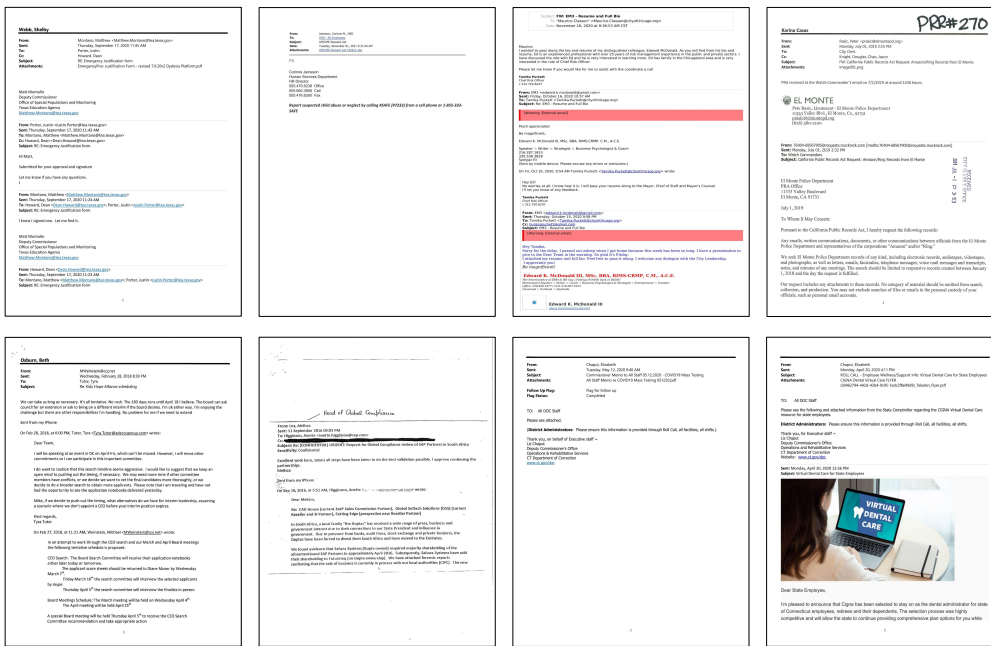

Figure 42: Samples of email documents from RVL-CDIP-N.

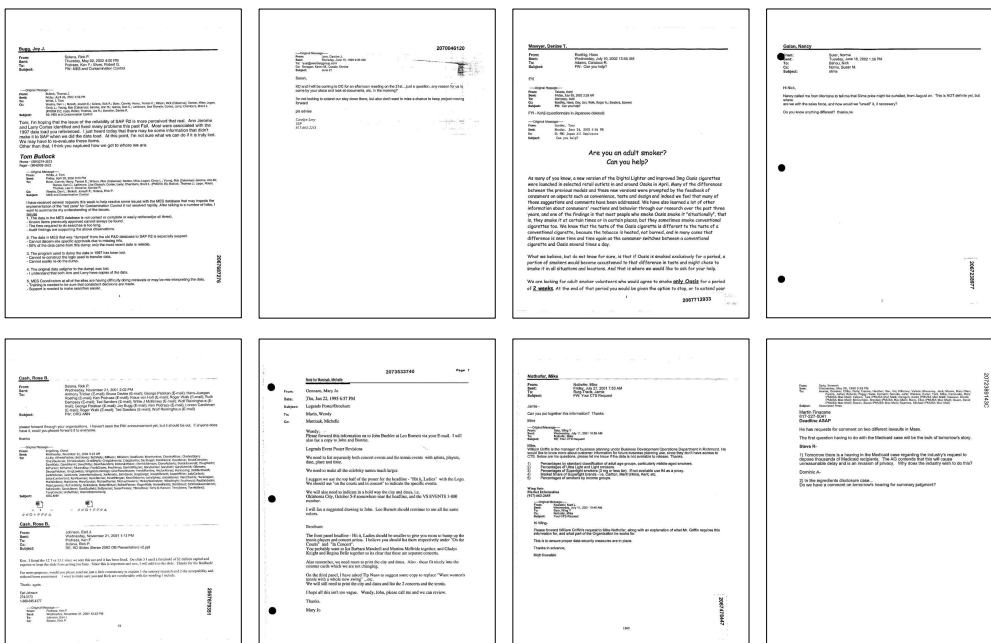

Figure 43: Samples of email documents from RVL-CDIP.
